# Supplementary material
Source: HighWire-hosted journal article supplement (https://rapm.bmj.com/highwire/filestream/16297/field_highwire_adjunct_files/1/rapm-2021-103007supp002_data_supplement.pdf)
Supplement: rapm-2021-103007supp002_data_supplement.pdf [file rapm-2021-103007supp002_data_supplement.pdf]

## Appendix B Clinical Opioid Withdrawal Score (COWS)

|                               |                               |
|-------------------------------|-------------------------------|
| <b>PATIENT NAME:</b>          | <b>DATE OF ASSESSMENT:</b>    |
| <b>PATIENT DATE OF BIRTH:</b> | <b>MEDICAL RECORD NUMBER:</b> |

### Clinical Opioid Withdrawal Score (COWS)

For each item, write in the number that best describes the patient's signs or symptom. Rate only the apparent relationship to opiate withdrawal. For example: If heart rate is increased because the patient was jogging just prior to assessment, the increased pulse rate would not add to the score.

| Enter scores at time zero, 30 minutes after first dose, 2 hours after first dose, etc.                                                                                                                                                                                                                                                                           | Time: | Time: | Time: | Time: |
|------------------------------------------------------------------------------------------------------------------------------------------------------------------------------------------------------------------------------------------------------------------------------------------------------------------------------------------------------------------|-------|-------|-------|-------|
| <b>Resting Pulse Rate:</b> Record beats per minute after patient is sitting or lying down for one minute<br>• 0 - pulse rate 80 or below<br>• 1 - pulse rate 81–100<br>• 2 - pulse rate 101–120<br>• 4 - pulse rate greater than 120                                                                                                                             |       |       |       |       |
| <b>Sweating:</b> Over past ½ hour not accounted for by room temperature or activity<br>• 0 - no chills or flushing<br>• 1 - subjective chills or flushing<br>• 2 - flushed or observable moistness on face<br>• 3 - beads of sweat on brow or face<br>• 4 - sweat streaming off face                                                                             |       |       |       |       |
| <b>Restlessness:</b> Observation during assessment<br>• 0 - able to sit still<br>• 1 - reports difficulty sitting still, but is able to do so<br>• 3 - frequent shifting or extraneous movement of legs/arms<br>• 5 - unable to sit still for more than a few seconds                                                                                            |       |       |       |       |
| <b>Pupil size</b><br>• 0 - pupils pinned or normal size for light<br>• 1 - pupils possibly larger than normal for light<br>• 2 - pupils moderately dilated<br>• 5 - pupils dilated that only rim of the iris is visible                                                                                                                                          |       |       |       |       |
| <b>Bone or joint aches:</b> If patient was having pain previously, only the additional component attributed to opiate withdrawal is scored<br>• 0 - not present<br>• 1 - mild/diffuse discomfort<br>• 2 - patient reports severe diffuse aching of joints/muscles<br>• 4 - patient is rubbing joints or muscles and is unable to sit still because of discomfort |       |       |       |       |
| <b>Runny nose or tearing:</b> Not accounted for by cold symptoms or allergy<br>• 0 - none present<br>• 1 - nasal stuffiness or unusually moist eyes<br>• 2 - nose running or tearing<br>• 4 - nose constantly running or tears streaming down cheeks                                                                                                             |       |       |       |       |
| <b>GI upset:</b> Over last ½ hour<br>• 0 - no GI symptoms<br>• 1 - stomach cramps<br>• 2 - nausea or loose stool<br>• 3 - vomiting or diarrhea<br>• 5 - multiple episodes of diarrhea or vomiting                                                                                                                                                                |       |       |       |       |
| <b>Tremor:</b> Observation of outstretched hands<br>• 0 - no tremor<br>• 1 - tremor can be felt, but not observed<br>• 2 - slight tremor observable<br>• 4 - gross tremor or muscle twitching                                                                                                                                                                    |       |       |       |       |
| <b>Yawning:</b> Observation during assessment<br>• 0 - no yawning<br>• 1 - yawning once or twice during assessment<br>• 2 - yawning three or more times during assessment<br>• 4 - yawning several times/minute                                                                                                                                                  |       |       |       |       |
| <b>Anxiety or irritability</b><br>• 0 - none<br>• 1 - patient reports increasing irritability or anxiousness<br>• 2 - patient obviously irritable or anxious<br>• 4 - patient so irritable or anxious that participation in the assessment is difficult                                                                                                          |       |       |       |       |
| <b>Gooseflesh skin</b><br>• 0 - skin is smooth<br>• 3 - piloerection of skin can be felt or hairs standing up on arms<br>• 5 - prominent piloerection                                                                                                                                                                                                            |       |       |       |       |
| <b>5–12 = mild;</b><br><b>13–24 = moderate;</b><br><b>25–36 = moderately severe;</b><br><b>&gt; 36 = severe withdrawal</b>                                                                                                                                                                                                                                       |       |       |       |       |
| <b>TOTAL</b>                                                                                                                                                                                                                                                                                                                                                     |       |       |       |       |
| <b>OBSERVER INITIALS</b>                                                                                                                                                                                                                                                                                                                                         |       |       |       |       |

Journal of Psychoactive Drugs Volume 35 (2), April - June 2003 Source: Wesson, D. R., & Ling, W. (2003). The Clinical Opiate Withdrawal Scale (COWS). J Psychoactive Drugs, 35(2), 253-9.
